# Supplementary material
Source: publisher figshare collection journal article supplement (https://frontiersin.figshare.com/ndownloader/files/28982538)
Supplement: Supplementary file 1 [file 28982538]

Supplementary Table 2: Mineral magnetic properties of BKR trench site

| **Zone** |  | **Xlf  x10-8 m3 kg-1** | **Xarm x 10-5 m3 kg-1** | **S-ratio** | **SIRM x 10-5 Am2 kg-1** |
| --- | --- | --- | --- | --- | --- |
| **Zone 7** |  | 2.36 | 1.3 | 0.77 | 2.76 |
|  | 1.72 | 8.7 | 0.75 | 2.02 |
|  | 1.67 | 6.82 | 0.76 | 1.9 |
| **Minimum** | 1.67 | 6.82 | 0.75 | 1.9 |
| **Maximum** | 2.36 | 12.8 | 0.77 | 2.76 |
| **Median** | 1.72 | 8.7E | 0.76 | 2.02 |
| **Zone 6** |  | 1.56 | 5.71 | 0.76 | 1.75 |
|  | 1.58 | 6.12 | 0.75 | 1.78 |
| **Minimum** | 1.56 | 5.71 | 7.53 | 1.76 |
| **Maximum** | 1.58 | 6.12 | 7.66 | 1.79 |
| **Median** | 1.57 | 5.92 | 7.59 | 1.77 |
| **Zone 5** |  | 1.65 | 7.1 | 0.72 | 1.98 |
|  | 1.74 | 8.22 | 0.72 | 2.12 |
|  | 1.85 | 8.49 | 0.73 | 2.19 |
| **Minimum** | 1.65 | 7.1 | 0.72 | 1.98 |
| **Maximum** | 1.85 | 8.49 | 0.73 | 2.19 |
| **Median** | 1.74 | 8.22 | 0.72 | 2.12 |
| **Zone 4** |  | 1.82 | 8.52 | 0.76 | 2.19 |
|  | 1.87 | 8.86 | 0.75 | 2.17 |
| **Minimum** | 1.82 | 8.52 | 0.75 | 2.17 |
| **Maximum** | 1.87 | 8.86 | 0.76 | 2.19 |
| **Median** | 1.85 | 8.69 | 0.76 | 2.18 |
| **Zone 3** |  | 1.79 | 9.34 | 0.74 | 2.16 |
|  | 1.83 | 9.9 | 0.71 | 2.03 |
|  | 1.76 | 10.1 | 0.70 | 1.98 |
|  | 1.87 | 9.26 | 0.70 | 1.85 |
|  | 1.72 | 7.31 | 0.65 | 1.66 |
|  | 1.63 | 4.48 | 0.61 | 1.50 |
|  | 1.46 | 2.82 | 0.60 | 1.39 |
|  | 1.47 | 3.22 | 0.64 | 1.48 |
|  | 1.47 | 3.68 | 0.65 | 1.49 |
| **Minimum** | 1.46 | 2.82 | 0.60 | 1.39 |
| **Maximum** | 1.87 | 10.1 | 0.74 | 2.16 |
| **Median** | 1.72 | 7.31 | 0.65 | 1.66 |
| **Zone 2** |  | 1.55 | 3.6 | 0.69 | 1.66 |
|  | 1.56 | 2.61 | 0.63 | 1.51 |
| **Minimum** | 1.55 | 2.61 | 0.63 | 1.51 |
| **Maximum** | 1.56 | 3.6 | 0.69 | 1.66 |
| **Median** | 1.55 | 3.11 | 0.66 | 1.59 |
| **Zone 1** |  | 1.42 | 1.82 | 0.63 | 1.57 |
|  | 1.18 | 1.6 | 0.62 | 1.22 |
|  | 1.18 | 1.45 | 0.73 | 1.29 |
|  | 1.57 | 3.82 | 0.72 | 1.56 |
|  | 1.97 | 5.88 | 0.71 | 1.84 |
| **Minimum** | 1.18 | 1.45 | 0.62 | 1.22 |
| **Maximum** | 1.97 | 5.88 | 0.73 | 1.84 |
| **Median** | 1.42 | 1.82 | 0.71 | 1.56 |
